# Supplementary material for: Examining Association of Personality Characteristics and Neuropsychiatric Symptoms in Post-COVID Syndrome
Source: MDPI journal article supplement (doi:10.3390/brainsci12020265), 2022-02-14
Supplement: s1 [file s1]

**Table S1.** Neuropsychological tests.

|                                                                                                                                 |
|---------------------------------------------------------------------------------------------------------------------------------|
| Corsi block-tapping test                                                                                                        |
| Symbol Digit Modalities Test                                                                                                    |
| Boston Naming Test                                                                                                              |
| Judgment of Line Orientation                                                                                                    |
| Rey-Osterrieth Complex Figure (copy and recall at 3 and 30 minutes, and recognition)                                            |
| Free and Cued Selective Reminding Test                                                                                          |
| Verbal fluencies (animals and words beginning with “p” and “m”; 1 minute per category)                                          |
| Stroop Color and Word Test                                                                                                      |
| Visual Object and Space Perception Battery (object decision, progressive silhouettes, number location, position discrimination) |
| Trail Making Test (S1 form) (VTS)                                                                                               |
| Figural Memory Test (S11 form) (VTS)                                                                                            |
| Tower of London (TOL-F, S1 form) (VTS)                                                                                          |
| Response inhibition (S13 form) (VTS)                                                                                            |
| N-Back Verbal Test (S1 form) (VTS)                                                                                              |
| Cognitrone (S11 form) (VTS)                                                                                                     |
| Reaction Test (RT, S3 form) (VTS)                                                                                               |
| Determination Test (DT, S1 form) (VTS)                                                                                          |
| WAF battery (S1 form) (VTS)                                                                                                     |

VTS: Vienna Test System®; WAF: Perception and attention functions test.
